# Supplementary material for: Estimating Sepsis Incidence Using Administrative Data and Clinical Medical Record Review
Source: PubMed Central journal article supplement (PMC10466163; doi:10.1001/jamanetworkopen.2023.31168), 2023-08-29
Supplement: jamanetwopen-e2331168-s002.pdf [file jamanetwopen-e2331168-s002.pdf]

## Data Sharing Statement

Mellhammar. Estimating Sepsis Incidence Using Administrative Data and Clinical Medical Record Review. *JAMA Netw Open*. Published August 29, 2023.

doi:10.1001/jamanetworkopen.2023.31168

### Data

**Data available:** Yes

**Data types:** Deidentified participant data

**How to access data:** Since the data can be regarded as sensitive (Health) data will be available upon request

**When available:** With publication

### Supporting Documents

**Document types:** None

### Additional Information

**Who can access the data:** Since the data can be regarded as sensitive (Health) data will be available upon request

**Types of analyses:** For further studies

**Mechanisms of data availability:** With investigator support
